# Supplementary material for: Hydration-dependent anomalous thermal expansion behaviour in a coordination polymer
Source: Royal Society of Chemistry journal article supplement (doi:10.1039/c6cc00158k), 2016-01-01
Supplement: c6cc00158k1.pdf [file c6cc00158k1.pdf]

## Supporting Information

# Hydration-Dependent Anomalous Thermal Expansion Behaviour in a Coordination Polymer

Prem Lama, Lukman O. Alimi, Raj Kumar Das and Leonard J. Barbour\*

Department of Chemistry and Polymer Science, University of Stellenbosch, Matieland 7602, Stellenbosch, South Africa

### Synthesis

All chemicals and solvent used in these experiments were purchased from Aldrich and used without any further purification.

### Synthesis of $\{[\text{Zn}(\text{BTC})(\text{HBPP})]\cdot\text{H}_2\text{O}\}_n$ ( $1\cdot\text{H}_2\text{O}$ )

1,3,5-Benzenetricarboxylic acid (20 mg, 0.095 mmol) and 1,3-bis(4-pyridyl)propane (19 mg, 0.095 mmol) were dissolved in 4.8 mL of DMF whereas  $\text{Zn}(\text{NO}_3)_2\cdot 4\text{H}_2\text{O}$  (29 mg, 0.095 mmol) was dissolved in 3.6 mL of *water* and acidified with  $\text{H}_2\text{SO}_4$  (1M, 0.2 mL). Both the solutions were heated and the hot clear solutions were combined in a sealed glass vial. The solution was heated at 80 °C for 24 hours followed by cooling to room temperature. The solution was then kept at -10 °C and after two weeks phase-pure single crystals  $1\cdot\text{H}_2\text{O}$  were obtained.

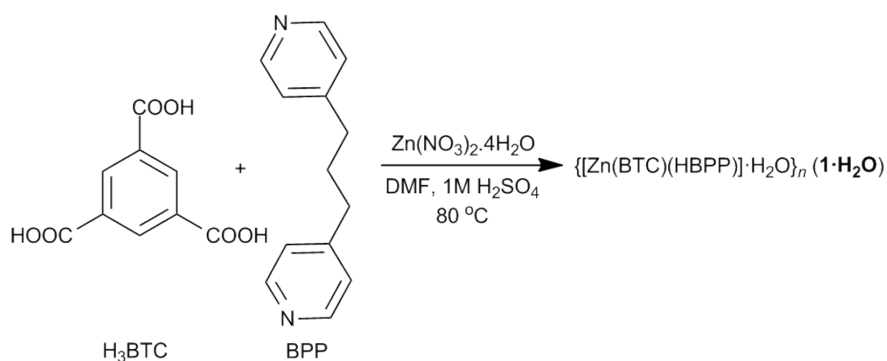

**Scheme S1.** Synthetic scheme for  $1\cdot\text{H}_2\text{O}$ .

### Calculation of the coefficients of linear thermal expansion

The unit cell parameters of single crystals of  $1\cdot\text{H}_2\text{O}$  and  $1$  were measured at 20 K and 30 K intervals respectively. The results of the measurements are summarised in Tables S1-S3. These values were used to calculate the linear thermal expansion coefficient,  $\alpha$ , for each of the axes  $a$ ,  $b$  and  $c$  using the following equation:

$$\alpha = \Delta L / (L_0 \Delta T)$$

$\Delta L$  is the difference in length of the crystallographic axis,  $L_0$  is the initial axis length at the initial temperature,  $T_0$ , and  $\Delta T$  is the change in temperature. The volumetric expansion coefficient,  $\alpha_V$ , can be calculated using a modified form of the above equation, i.e. by substituting  $\Delta V$  for  $\Delta L$  and  $V_0$  for  $L_0$ . The standard deviations for thermal expansion coefficients are calculated using the “propagation of measurement uncertainty” method.<sup>1</sup> The crystal mosaicity remains approximately the same for the different unit cell determinations.

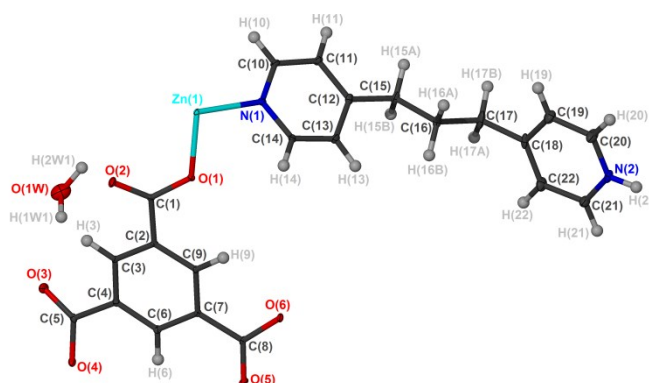

**Figure S1.** View of Asymmetric Unit in  $1 \cdot \text{H}_2\text{O}$ .

## Single Crystal X-ray Diffraction (SCD)

### Experimental

Single crystal X-ray diffraction data were collected on a Bruker APEX-II Quasar CCD area-detector diffractometer equipped with an Oxford Cryosystems Cryostream 700Plus cryostat. A multilayer monochromator with  $\text{MoK}\alpha$  radiation ( $\lambda = 0.71073 \text{ \AA}$ ) from an Incoatec  $\text{I}_{\mu\text{S}}$  microsource was used.

Data reduction was carried out by means of standard procedures using the Bruker software package SAINT<sup>2</sup> and absorption corrections and the correction of other systematic errors were performed using SADABS.<sup>3</sup> The structures were solved by direct methods using SHELXS-97 and refined using SHELXL-97.<sup>4</sup> X-Seed<sup>5</sup> was used as the graphical interface for the SHELX program suite. Hydrogen atoms were placed in calculated positions using riding models.

**Table S1.** Crystallographic details for  $1 \cdot \text{H}_2\text{O}$

| Identification code                          | 260K                                                                   | 240K                                                                   | 220K                                                                   | 200K                                                                   | 180K                                                                   |
|----------------------------------------------|------------------------------------------------------------------------|------------------------------------------------------------------------|------------------------------------------------------------------------|------------------------------------------------------------------------|------------------------------------------------------------------------|
| Empirical formula                            | $\text{C}_{22}\text{H}_{20}\text{N}_2\text{O}_7\text{Zn}$              | $\text{C}_{22}\text{H}_{20}\text{N}_2\text{O}_7\text{Zn}$              | $\text{C}_{22}\text{H}_{20}\text{N}_2\text{O}_7\text{Zn}$              | $\text{C}_{22}\text{H}_{20}\text{N}_2\text{O}_7\text{Zn}$              | $\text{C}_{22}\text{H}_{20}\text{N}_2\text{O}_7\text{Zn}$              |
| Formula weight                               | 489.77                                                                 | 489.77                                                                 | 489.77                                                                 | 489.77                                                                 | 489.77                                                                 |
| Temperature/K                                | 260(2)                                                                 | 240(2)                                                                 | 220(2)                                                                 | 200(2)                                                                 | 180(2)                                                                 |
| Crystal system                               | Orthorhombic                                                           | Orthorhombic                                                           | Orthorhombic                                                           | Orthorhombic                                                           | Orthorhombic                                                           |
| Space group                                  | $Pna2_1$                                                               | $Pna2_1$                                                               | $Pna2_1$                                                               | $Pna2_1$                                                               | $Pna2_1$                                                               |
| $a/\text{\AA}$                               | 19.1062(9)                                                             | 19.1136(9)                                                             | 19.1176(9)                                                             | 19.1195(9)                                                             | 19.1196(10)                                                            |
| $b/\text{\AA}$                               | 7.8702(4)                                                              | 7.8642(4)                                                              | 7.8572(4)                                                              | 7.8491(4)                                                              | 7.8379(4)                                                              |
| $c/\text{\AA}$                               | 13.7665(7)                                                             | 13.7696(6)                                                             | 13.7712(7)                                                             | 13.7716(7)                                                             | 13.7729(7)                                                             |
| $\alpha/^\circ$                              | 90.00                                                                  | 90.00                                                                  | 90.00                                                                  | 90.00                                                                  | 90.00                                                                  |
| $\beta/^\circ$                               | 90.00                                                                  | 90.00                                                                  | 90.00                                                                  | 90.00                                                                  | 90.00                                                                  |
| $\gamma/^\circ$                              | 90.00                                                                  | 90.00                                                                  | 90.00                                                                  | 90.00                                                                  | 90.00                                                                  |
| Volume/ $\text{\AA}^3$                       | 2070.06(18)                                                            | 2069.75(17)                                                            | 2068.58(18)                                                            | 2066.72(18)                                                            | 2063.97(18)                                                            |
| $Z$                                          | 4                                                                      | 4                                                                      | 4                                                                      | 4                                                                      | 4                                                                      |
| $\rho_{\text{calc}}/\text{cm}^3$             | 1.572                                                                  | 1.572                                                                  | 1.573                                                                  | 1.574                                                                  | 1.576                                                                  |
| $\mu/\text{mm}^{-1}$                         | 1.235                                                                  | 1.235                                                                  | 1.236                                                                  | 1.237                                                                  | 1.239                                                                  |
| $F(000)$                                     | 1008                                                                   | 1008                                                                   | 1008                                                                   | 1008                                                                   | 1008                                                                   |
| Crystal size/ $\text{mm}^3$                  | $0.449 \times 0.331 \times 0.194$                                      | $0.449 \times 0.331 \times 0.194$                                      | $0.448 \times 0.331 \times 0.194$                                      | $0.447 \times 0.331 \times 0.194$                                      | $0.447 \times 0.331 \times 0.194$                                      |
| Radiation                                    | $\text{MoK}\alpha$ ( $\lambda = 0.71073$ )                             |
| $\theta$ range for data collection/ $^\circ$ | 2.13 to 25.97                                                          | 2.13 to 26.00                                                          | 2.13 to 26.01                                                          | 2.13 to 26.00                                                          | 2.13 to 26.01                                                          |
| Index ranges                                 | $-23 \leq h \leq 23$ ,<br>$-9 \leq k \leq 5$ ,<br>$-16 \leq l \leq 16$ | $-23 \leq h \leq 23$ ,<br>$-9 \leq k \leq 5$ ,<br>$-16 \leq l \leq 16$ | $-23 \leq h \leq 23$ ,<br>$-9 \leq k \leq 5$ ,<br>$-17 \leq l \leq 16$ | $-23 \leq h \leq 23$ ,<br>$-9 \leq k \leq 5$ ,<br>$-16 \leq l \leq 16$ | $-23 \leq h \leq 23$ ,<br>$-9 \leq k \leq 5$ ,<br>$-17 \leq l \leq 16$ |
| Reflections collected                        | 10710                                                                  | 10748                                                                  | 10746                                                                  | 10737                                                                  | 10711                                                                  |
| Independent reflections                      | 4025 [ $R_{\text{int}} =$                                              | 4041 [ $R_{\text{int}} =$                                              | 4043 [ $R_{\text{int}} = 0.0231$ ,                                     | 4039 [ $R_{\text{int}} = 0.0231$ ,                                     | 4032 [ $R_{\text{int}} =$                                              |

|                                                |                                      |                                      |                                     |                                     |                                      |
|------------------------------------------------|--------------------------------------|--------------------------------------|-------------------------------------|-------------------------------------|--------------------------------------|
|                                                | 0.0236, $R_{\text{sigma}} = 0.0439]$ | 0.0237, $R_{\text{sigma}} = 0.0457]$ | $R_{\text{sigma}} = 0.0447]$        | $R_{\text{sigma}} = 0.0446]$        | 0.0224, $R_{\text{sigma}} = 0.0442]$ |
| Data/restraints/parameters                     | 4025/4/289                           | 4041/4/289                           | 4043/4/289                          | 4039/4/289                          | 4032/4/289                           |
| Goodness-of-fit on $F^2$                       | 1.062                                | 1.074                                | 1.084                               | 1.060                               | 1.092                                |
| Final R indexes [ $I \geq 2\sigma$ (I)]        | $R_1 = 0.0284$ ,<br>$wR_2 = 0.0751$  | $R_1 = 0.0274$ ,<br>$wR_2 = 0.0732$  | $R_1 = 0.0269$ ,<br>$wR_2 = 0.0692$ | $R_1 = 0.0258$ ,<br>$wR_2 = 0.0665$ | $R_1 = 0.0255$ ,<br>$wR_2 = 0.0651$  |
| Final R indexes [all data]                     | $R_1 = 0.0314$ ,<br>$wR_2 = 0.0770$  | $R_1 = 0.0297$ ,<br>$wR_2 = 0.0746$  | $R_1 = 0.0293$ ,<br>$wR_2 = 0.0703$ | $R_1 = 0.0278$ ,<br>$wR_2 = 0.0675$ | $R_1 = 0.0278$ ,<br>$wR_2 = 0.0663$  |
| Largest diff. peak/hole / $e \text{ \AA}^{-3}$ | 0.286/-0.508                         | 0.296/-0.475                         | 0.272/-0.484                        | 0.248/-0.523                        | 0.263/-0.540                         |
| Mosaicity                                      | 0.36                                 | 0.35                                 | 0.36                                | 0.36                                | 0.36                                 |

| Identification code                            | 160K                                                                   | 140K                                                                   | 120K                                                                   | 100K                                                                   | 260K-R                                                                 |
|------------------------------------------------|------------------------------------------------------------------------|------------------------------------------------------------------------|------------------------------------------------------------------------|------------------------------------------------------------------------|------------------------------------------------------------------------|
| Empirical formula                              | $C_{22}H_{20}N_2O_7Zn$                                                 | $C_{22}H_{20}N_2O_7Zn$                                                 | $C_{22}H_{20}N_2O_7Zn$                                                 | $C_{22}H_{20}N_2O_7Zn$                                                 | $C_{22}H_{20}N_2O_7Zn$                                                 |
| Formula weight                                 | 489.77                                                                 | 489.77                                                                 | 489.77                                                                 | 489.77                                                                 | 489.77                                                                 |
| Temperature/K                                  | 160(2)                                                                 | 140(2)                                                                 | 120(2)                                                                 | 100(2)                                                                 | 260R(2)                                                                |
| Crystal system                                 | Orthorhombic                                                           | Orthorhombic                                                           | Orthorhombic                                                           | Orthorhombic                                                           | Orthorhombic                                                           |
| Space group                                    | $Pna2_1$                                                               | $Pna2_1$                                                               | $Pna2_1$                                                               | $Pna2_1$                                                               | $Pna2_1$                                                               |
| $a/\text{\AA}$                                 | 19.1211(10)                                                            | 19.1203(11)                                                            | 19.1221(11)                                                            | 19.1246(11)                                                            | 19.1073(9)                                                             |
| $b/\text{\AA}$                                 | 7.8289(4)                                                              | 7.8191(4)                                                              | 7.8119(5)                                                              | 7.8040(5)                                                              | 7.8706(4)                                                              |
| $c/\text{\AA}$                                 | 13.7769(8)                                                             | 13.7785(8)                                                             | 13.7812(8)                                                             | 13.7839(8)                                                             | 13.7668(6)                                                             |
| $\alpha/^\circ$                                | 90.00                                                                  | 90.00                                                                  | 90.00                                                                  | 90.00                                                                  | 90.00                                                                  |
| $\beta/^\circ$                                 | 90.00                                                                  | 90.00                                                                  | 90.00                                                                  | 90.00                                                                  | 90.00                                                                  |
| $\gamma/^\circ$                                | 90.00                                                                  | 90.00                                                                  | 90.00                                                                  | 90.00                                                                  | 90.00                                                                  |
| Volume/ $\text{\AA}^3$                         | 2062.36(19)                                                            | 2059.9(2)                                                              | 2058.6(2)                                                              | 2057.2(2)                                                              | 2070.33(17)                                                            |
| Z                                              | 4                                                                      | 4                                                                      | 4                                                                      | 4                                                                      | 4                                                                      |
| $\rho_{\text{calc}}/\text{g cm}^{-3}$          | 1.577                                                                  | 1.579                                                                  | 1.580                                                                  | 1.581                                                                  | 1.571                                                                  |
| $\mu/\text{mm}^{-1}$                           | 1.240                                                                  | 1.241                                                                  | 1.242                                                                  | 1.243                                                                  | 1.235                                                                  |
| F(000)                                         | 1008                                                                   | 1008                                                                   | 1008                                                                   | 1008                                                                   | 1008                                                                   |
| Crystal size/ $\text{mm}^3$                    | $0.446 \times 0.331 \times 0.194$                                      | $0.446 \times 0.331 \times 0.194$                                      | $0.445 \times 0.331 \times 0.194$                                      | $0.445 \times 0.331 \times 0.194$                                      | $0.449 \times 0.331 \times 0.194$                                      |
| Radiation                                      | MoK $\alpha$ ( $\lambda = 0.71073$ )                                   |
| $\theta$ range for data collection/ $^\circ$   | 2.13 to 26.00                                                          | 2.13 to 25.99                                                          | 2.13 to 26.02                                                          | 2.13 to 25.97                                                          | 2.13 to 25.99                                                          |
| Index ranges                                   | $-23 \leq h \leq 23$ ,<br>$-9 \leq k \leq 5$ ,<br>$-16 \leq l \leq 16$ | $-23 \leq h \leq 23$ ,<br>$-9 \leq k \leq 5$ ,<br>$-16 \leq l \leq 16$ | $-23 \leq h \leq 23$ ,<br>$-9 \leq k \leq 4$ ,<br>$-17 \leq l \leq 16$ | $-23 \leq h \leq 23$ ,<br>$-9 \leq k \leq 4$ ,<br>$-16 \leq l \leq 16$ | $-23 \leq h \leq 23$ ,<br>$-9 \leq k \leq 5$ ,<br>$-16 \leq l \leq 16$ |
| Reflections collected                          | 10672                                                                  | 10643                                                                  | 10650                                                                  | 10608                                                                  | 10740                                                                  |
| Independent reflections                        | 4017 [ $R_{\text{int}} = 0.0224$ , $R_{\text{sigma}} = 0.0429]$        | 4005 [ $R_{\text{int}} = 0.0225$ , $R_{\text{sigma}} = 0.0443]$        | 4011 [ $R_{\text{int}} = 0.0223$ , $R_{\text{sigma}} = 0.0433]$        | 3994 [ $R_{\text{int}} = 0.0220$ , $R_{\text{sigma}} = 0.0433]$        | 4032 [ $R_{\text{int}} = 0.0237$ , $R_{\text{sigma}} = 0.0447]$        |
| Data/restraints/parameters                     | 4017/4/289                                                             | 4005/4/289                                                             | 4011/4/289                                                             | 3994/4/289                                                             | 4032/4/289                                                             |
| Goodness-of-fit on $F^2$                       | 1.099                                                                  | 1.104                                                                  | 1.092                                                                  | 1.095                                                                  | 1.067                                                                  |
| Final R indexes [ $I \geq 2\sigma$ (I)]        | $R_1 = 0.0258$ ,<br>$wR_2 = 0.0669$                                    | $R_1 = 0.0258$ ,<br>$wR_2 = 0.0669$                                    | $R_1 = 0.0258$ ,<br>$wR_2 = 0.0659$                                    | $R_1 = 0.0257$ , $wR_2 = 0.0674$                                       | $R_1 = 0.0288$ ,<br>$wR_2 = 0.0754$                                    |
| Final R indexes [all data]                     | $R_1 = 0.0280$ ,<br>$wR_2 = 0.0680$                                    | $R_1 = 0.0275$ ,<br>$wR_2 = 0.0678$                                    | $R_1 = 0.0276$ ,<br>$wR_2 = 0.0669$                                    | $R_1 = 0.0275$ , $wR_2 = 0.0684$                                       | $R_1 = 0.0317$ ,<br>$wR_2 = 0.0771$                                    |
| Largest diff. peak/hole / $e \text{ \AA}^{-3}$ | 0.392/-0.514                                                           | 0.406/-0.533                                                           | 0.446/-0.538                                                           | 0.440/-0.508                                                           | 0.321/-0.504                                                           |
| Mosaicity                                      | 0.36                                                                   | 0.36                                                                   | 0.36                                                                   | 0.36                                                                   | 0.35                                                                   |

**Table S2. Unit cell axes and cell volume at variable temperatures for  $1 \cdot H_2O$ .**

| T (K) | a ( $\text{\AA}$ ) | St. dev.* | b ( $\text{\AA}$ ) | St. dev.* | c ( $\text{\AA}$ ) | St. dev.* | V ( $\text{\AA}^3$ ) | St. dev.* | Crystal mosaicity |
|-------|--------------------|-----------|--------------------|-----------|--------------------|-----------|----------------------|-----------|-------------------|
| 260   | 19.1062            | 0.0009    | 7.8702             | 0.0004    | 13.7665            | 0.0007    | 2070.06              | 0.18      | 0.36              |
| 240   | 19.1136            | 0.0009    | 7.8642             | 0.0004    | 13.7696            | 0.0006    | 2069.75              | 0.17      | 0.35              |
| 220   | 19.1176            | 0.0009    | 7.8572             | 0.0004    | 13.7712            | 0.0007    | 2068.58              | 0.18      | 0.36              |
| 200   | 19.1195            | 0.0009    | 7.8491             | 0.0004    | 13.7716            | 0.0007    | 2066.72              | 0.18      | 0.36              |
| 180   | 19.1196            | 0.0010    | 7.8379             | 0.0004    | 13.7729            | 0.0007    | 2063.97              | 0.18      | 0.36              |
| 160   | 19.1211            | 0.0010    | 7.8289             | 0.0004    | 13.7769            | 0.0008    | 2062.36              | 0.19      | 0.36              |
| 140   | 19.1203            | 0.0011    | 7.8191             | 0.0004    | 13.7785            | 0.0008    | 2059.9               | 0.2       | 0.36              |
| 120   | 19.1221            | 0.0011    | 7.8119             | 0.0005    | 13.7812            | 0.0008    | 2058.6               | 0.2       | 0.36              |
| 100   | 19.1246            | 0.0011    | 7.8040             | 0.0005    | 13.7839            | 0.0008    | 2057.2               | 0.2       | 0.36              |
| 260-R | 19.1073            | 0.0009    | 7.8706             | 0.0004    | 13.7668            | 0.0006    | 2070.33              | 0.17      | 0.35              |

\*Standard deviation calculated from unit cell refinement using the Apex II software suite.

**Table S3. Crystallographic details for 1**

| Identification code                                   | 310K                                                              | 280K                                                              | 250K                                                              | 220K                                                              | 190K                                                              |
|-------------------------------------------------------|-------------------------------------------------------------------|-------------------------------------------------------------------|-------------------------------------------------------------------|-------------------------------------------------------------------|-------------------------------------------------------------------|
| Empirical formula                                     | C <sub>22</sub> H <sub>18</sub> N <sub>2</sub> O <sub>6</sub> Zn  | C <sub>22</sub> H <sub>18</sub> N <sub>2</sub> O <sub>6</sub> Zn  | C <sub>22</sub> H <sub>18</sub> N <sub>2</sub> O <sub>6</sub> Zn  | C <sub>22</sub> H <sub>18</sub> N <sub>2</sub> O <sub>6</sub> Zn  | C <sub>22</sub> H <sub>18</sub> N <sub>2</sub> O <sub>6</sub> Zn  |
| Formula weight                                        | 471.75                                                            | 471.75                                                            | 471.75                                                            | 471.75                                                            | 471.75                                                            |
| Temperature/K                                         | 310(2)                                                            | 280(2)                                                            | 250(2)                                                            | 220(2)                                                            | 190(2)                                                            |
| Crystal system                                        | Orthorhombic                                                      | Orthorhombic                                                      | Orthorhombic                                                      | Orthorhombic                                                      | Orthorhombic                                                      |
| Space group                                           | <i>Pna</i> 2 <sub>1</sub>                                         |
| <i>a</i> /Å                                           | 18.972(2)                                                         | 18.9725(19)                                                       | 18.9745(19)                                                       | 18.983(2)                                                         | 18.977(2)                                                         |
| <i>b</i> /Å                                           | 7.8309(9)                                                         | 7.8178(8)                                                         | 7.8080(8)                                                         | 7.8009(9)                                                         | 7.7881(9)                                                         |
| <i>c</i> /Å                                           | 13.6741(15)                                                       | 13.6767(14)                                                       | 13.6816(14)                                                       | 13.6902(16)                                                       | 13.6890(15)                                                       |
| $\alpha$ /°                                           | 90.00                                                             | 90.00                                                             | 90.00                                                             | 90.00                                                             | 90.00                                                             |
| $\beta$ /°                                            | 90.00                                                             | 90.00                                                             | 90.00                                                             | 90.00                                                             | 90.00                                                             |
| $\gamma$ /°                                           | 90.00                                                             | 90.00                                                             | 90.00                                                             | 90.00                                                             | 90.00                                                             |
| Volume/Å <sup>3</sup>                                 | 2031.6(4)                                                         | 2028.6(4)                                                         | 2027.0(4)                                                         | 2027.3(4)                                                         | 2023.2(4)                                                         |
| Z                                                     | 4                                                                 | 4                                                                 | 4                                                                 | 4                                                                 | 4                                                                 |
| $\rho_{\text{calc}}$ /cm <sup>3</sup>                 | 1.542                                                             | 1.545                                                             | 1.546                                                             | 1.546                                                             | 1.549                                                             |
| $\mu$ /mm <sup>-1</sup>                               | 1.252                                                             | 1.254                                                             | 1.255                                                             | 1.255                                                             | 1.257                                                             |
| F(000)                                                | 968                                                               | 968                                                               | 968                                                               | 968                                                               | 968                                                               |
| Crystal size/mm <sup>3</sup>                          | 0.553 × 0.208 × 0.186                                             | 0.552 × 0.208 × 0.186                                             | 0.552 × 0.208 × 0.186                                             | 0.551 × 0.208 × 0.186                                             | 0.550 × 0.208 × 0.186                                             |
| Radiation                                             | MoK $\alpha$ ( $\lambda$ = 0.71073)                               |
| $\theta$ range for data collection/°                  | 2.15 to 26.00                                                     | 2.15 to 25.97                                                     | 2.15 to 25.97                                                     | 2.15 to 25.97                                                     | 2.15 to 25.97                                                     |
| Index ranges                                          | -23 ≤ <i>h</i> ≤ 18,<br>-9 ≤ <i>k</i> ≤ 7,<br>-16 ≤ <i>l</i> ≤ 16 | -23 ≤ <i>h</i> ≤ 18,<br>-9 ≤ <i>k</i> ≤ 7,<br>-16 ≤ <i>l</i> ≤ 16 | -18 ≤ <i>h</i> ≤ 23,<br>-9 ≤ <i>k</i> ≤ 7,<br>-16 ≤ <i>l</i> ≤ 16 | -18 ≤ <i>h</i> ≤ 23,<br>-9 ≤ <i>k</i> ≤ 7,<br>-16 ≤ <i>l</i> ≤ 16 | -18 ≤ <i>h</i> ≤ 23,<br>-9 ≤ <i>k</i> ≤ 7,<br>-16 ≤ <i>l</i> ≤ 16 |
| Reflections collected                                 | 10474                                                             | 10535                                                             | 10515                                                             | 10089                                                             | 10419                                                             |
| Independent reflections                               | 3940 [R <sub>int</sub> = 0.0373, R <sub>sigma</sub> = 0.0559]     | 3932 [R <sub>int</sub> = 0.0357, R <sub>sigma</sub> = 0.0542]     | 3927 [R <sub>int</sub> = 0.0362, R <sub>sigma</sub> = 0.0550]     | 3916 [R <sub>int</sub> = 0.0360, R <sub>sigma</sub> = 0.0546]     | 3911 [R <sub>int</sub> = 0.0343, R <sub>sigma</sub> = 0.0531]     |
| Data/restraints/parameters                            | 3940/1/280                                                        | 3932/1/280                                                        | 3927/1/280                                                        | 3916/1/280                                                        | 3911/1/280                                                        |
| Goodness-of-fit on F <sup>2</sup>                     | 1.030                                                             | 1.044                                                             | 1.045                                                             | 1.057                                                             | 1.056                                                             |
| Final R indexes [ <i>I</i> > 2 $\sigma$ ( <i>I</i> )] | R <sub>1</sub> = 0.0415,<br>wR <sub>2</sub> = 0.0962              | R <sub>1</sub> = 0.0396,<br>wR <sub>2</sub> = 0.0930              | R <sub>1</sub> = 0.0406,<br>wR <sub>2</sub> = 0.0977              | R <sub>1</sub> = 0.0387,<br>wR <sub>2</sub> = 0.0918              | R <sub>1</sub> = 0.0370,<br>wR <sub>2</sub> = 0.0897              |
| Final R indexes [all data]                            | R <sub>1</sub> = 0.0535,<br>wR <sub>2</sub> = 0.1018              | R <sub>1</sub> = 0.0509,<br>wR <sub>2</sub> = 0.0979              | R <sub>1</sub> = 0.0509,<br>wR <sub>2</sub> = 0.1029              | R <sub>1</sub> = 0.0477,<br>wR <sub>2</sub> = 0.0958              | R <sub>1</sub> = 0.0446,<br>wR <sub>2</sub> = 0.0935              |
| Largest diff. peak/hole / e Å <sup>-3</sup>           | 0.527/-0.306                                                      | 0.494/-0.290                                                      | 0.740/-0.275                                                      | 0.655/-0.323                                                      | 0.612/-0.285                                                      |
| Mosaicity                                             | 0.34                                                              | 0.34                                                              | 0.34                                                              | 0.34                                                              | 0.34                                                              |

| Identification code                   | 160K                                                              | 130K                                                              | 100K                                                              | 310K-R                                                            |
|---------------------------------------|-------------------------------------------------------------------|-------------------------------------------------------------------|-------------------------------------------------------------------|-------------------------------------------------------------------|
| Empirical formula                     | C <sub>22</sub> H <sub>18</sub> N <sub>2</sub> O <sub>6</sub> Zn  | C <sub>22</sub> H <sub>18</sub> N <sub>2</sub> O <sub>6</sub> Zn  | C <sub>22</sub> H <sub>18</sub> N <sub>2</sub> O <sub>6</sub> Zn  | C <sub>22</sub> H <sub>18</sub> N <sub>2</sub> O <sub>6</sub> Zn  |
| Formula weight                        | 471.75                                                            | 471.75                                                            | 471.75                                                            | 471.75                                                            |
| Temperature/K                         | 160(2)                                                            | 130(2)                                                            | 100(2)                                                            | 310R(2)                                                           |
| Crystal system                        | Orthorhombic                                                      | Orthorhombic                                                      | Orthorhombic                                                      | Orthorhombic                                                      |
| Space group                           | <i>Pna</i> 2 <sub>1</sub>                                         | <i>Pna</i> 2 <sub>1</sub>                                         | <i>Pna</i> 2 <sub>1</sub>                                         | <i>Pna</i> 2 <sub>1</sub>                                         |
| <i>a</i> /Å                           | 18.976(2)                                                         | 18.9781(18)                                                       | 18.9732(17)                                                       | 18.973(2)                                                         |
| <i>b</i> /Å                           | 7.7768(8)                                                         | 7.7660(8)                                                         | 7.7530(7)                                                         | 7.8316(9)                                                         |
| <i>c</i> /Å                           | 13.6920(14)                                                       | 13.6963(13)                                                       | 13.6972(12)                                                       | 13.6758(15)                                                       |
| $\alpha$ /°                           | 90.00                                                             | 90.00                                                             | 90.00                                                             | 90.00                                                             |
| $\beta$ /°                            | 90.00                                                             | 90.00                                                             | 90.00                                                             | 90.00                                                             |
| $\gamma$ /°                           | 90.00                                                             | 90.00                                                             | 90.00                                                             | 90.00                                                             |
| Volume/Å <sup>3</sup>                 | 2020.6(4)                                                         | 2018.6(3)                                                         | 2014.8(3)                                                         | 2032.1(4)                                                         |
| Z                                     | 4                                                                 | 4                                                                 | 4                                                                 | 4                                                                 |
| $\rho_{\text{calc}}$ /cm <sup>3</sup> | 1.551                                                             | 1.552                                                             | 1.555                                                             | 1.542                                                             |
| $\mu$ /mm <sup>-1</sup>               | 1.259                                                             | 1.260                                                             | 1.262                                                             | 1.252                                                             |
| F(000)                                | 968                                                               | 968                                                               | 968                                                               | 968                                                               |
| Crystal size/mm <sup>3</sup>          | 0.549 × 0.208 × 0.186                                             | 0.549 × 0.208 × 0.186                                             | 0.548 × 0.208 × 0.186                                             | 0.553 × 0.208 × 0.186                                             |
| Radiation                             | MoK $\alpha$ ( $\lambda$ = 0.71073)                               |
| $\theta$ range for data collection/°  | 2.15 to 25.97                                                     | 2.15 to 25.97                                                     | 2.15 to 25.96                                                     | 2.15 to 25.98                                                     |
| Index ranges                          | -18 ≤ <i>h</i> ≤ 23,<br>-9 ≤ <i>k</i> ≤ 7,<br>-16 ≤ <i>l</i> ≤ 16 | -18 ≤ <i>h</i> ≤ 23,<br>-9 ≤ <i>k</i> ≤ 7,<br>-16 ≤ <i>l</i> ≤ 16 | -18 ≤ <i>h</i> ≤ 23,<br>-9 ≤ <i>k</i> ≤ 7,<br>-16 ≤ <i>l</i> ≤ 16 | -23 ≤ <i>h</i> ≤ 18,<br>-9 ≤ <i>k</i> ≤ 7,<br>-16 ≤ <i>l</i> ≤ 16 |
| Reflections collected                 | 10418                                                             | 10380                                                             | 10386                                                             | 10539                                                             |
| Independent reflections               | 3908 [R <sub>int</sub> =                                          | 3901 [R <sub>int</sub> =                                          | 3896 [R <sub>int</sub> =                                          | 3946 [R <sub>int</sub> =                                          |

|                                               |                                                      |                                                      |                                                      |                                                      |
|-----------------------------------------------|------------------------------------------------------|------------------------------------------------------|------------------------------------------------------|------------------------------------------------------|
|                                               | 0.0340,<br>R <sub>sigma</sub> = 0.0524]              | 0.0336, R <sub>sigma</sub> =<br>0.0524]              | 0.0326, R <sub>sigma</sub> =<br>0.0504]              | 0.0381, R <sub>sigma</sub> =<br>0.0567]              |
| Data/restraints/parameters                    | 3908/1/280                                           | 3901/1/280                                           | 3896/1/280                                           | 3946/1/280                                           |
| Goodness-of-fit on F <sup>2</sup>             | 1.061                                                | 1.060                                                | 1.059                                                | 1.029                                                |
| Final R indexes [ <i>I</i> ≥ 2σ ( <i>I</i> )] | R <sub>1</sub> = 0.0363,<br>wR <sub>2</sub> = 0.0860 | R <sub>1</sub> = 0.0360,<br>wR <sub>2</sub> = 0.0866 | R <sub>1</sub> = 0.0354,<br>wR <sub>2</sub> = 0.0854 | R <sub>1</sub> = 0.0416,<br>wR <sub>2</sub> = 0.0964 |
| Final R indexes [all data]                    | R <sub>1</sub> = 0.0434,<br>wR <sub>2</sub> = 0.0893 | R <sub>1</sub> = 0.0425,<br>wR <sub>2</sub> = 0.0901 | R <sub>1</sub> = 0.0409,<br>wR <sub>2</sub> = 0.0881 | R <sub>1</sub> = 0.0547,<br>wR <sub>2</sub> = 0.1023 |
| Largest diff. peak/hole / e Å <sup>-3</sup>   | 0.743/-0.320                                         | 0.709/-0.248                                         | 0.669/-0.251                                         | 0.585/-0.323                                         |
| Mosaicity                                     | 0.34                                                 | 0.34                                                 | 0.34                                                 | 0.34                                                 |

**Table S4. Unit cell axes and cell volume at variable temperatures for 1.**

| <i>T</i> (K) | <i>a</i> (Å) | St. dev.* | <i>b</i> (Å) | St. dev.* | <i>c</i> (Å) | St. dev.* | <i>V</i> (Å <sup>3</sup> ) | St. dev.* | Crystal<br>mosaicity |
|--------------|--------------|-----------|--------------|-----------|--------------|-----------|----------------------------|-----------|----------------------|
| 310          | 18.972       | 0.002     | 7.8309       | 0.0009    | 13.6741      | 0.0015    | 2031.6                     | 0.4       | 0.34                 |
| 280          | 18.9725      | 0.0019    | 7.8178       | 0.0008    | 13.6767      | 0.0014    | 2028.6                     | 0.4       | 0.34                 |
| 250          | 18.9745      | 0.0019    | 7.8080       | 0.0008    | 13.6816      | 0.0014    | 2027.0                     | 0.4       | 0.34                 |
| 220          | 18.983       | 0.002     | 7.8009       | 0.0009    | 13.6902      | 0.0016    | 2027.3                     | 0.4       | 0.34                 |
| 190          | 18.977       | 0.002     | 7.7881       | 0.0009    | 13.6890      | 0.0015    | 2023.2                     | 0.4       | 0.34                 |
| 160          | 18.976       | 0.002     | 7.7768       | 0.0008    | 13.6920      | 0.0014    | 2020.6                     | 0.4       | 0.34                 |
| 130          | 18.9781      | 0.0018    | 7.7660       | 0.0008    | 13.6963      | 0.0013    | 2018.6                     | 0.3       | 0.34                 |
| 100          | 18.9732      | 0.0017    | 7.7530       | 0.0007    | 13.6972      | 0.0012    | 2014.8                     | 0.3       | 0.34                 |
| 310-R        | 18.973       | 0.002     | 7.8316       | 0.0009    | 13.6758      | 0.0015    | 2032.1                     | 0.4       | 0.34                 |

\*Standard deviation calculated from unit cell refinement using the Apex II software suite.

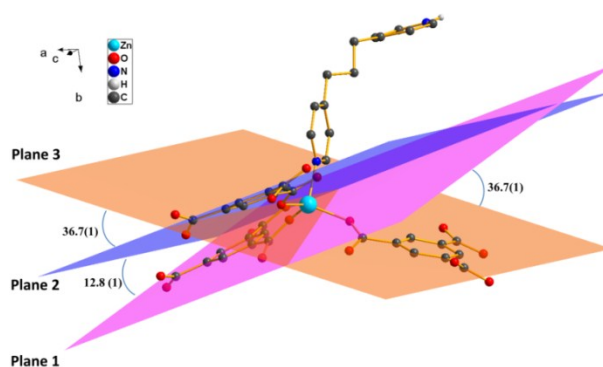

**Figure S2. Perspective view of dihedral angles in 1·H<sub>2</sub>O.**

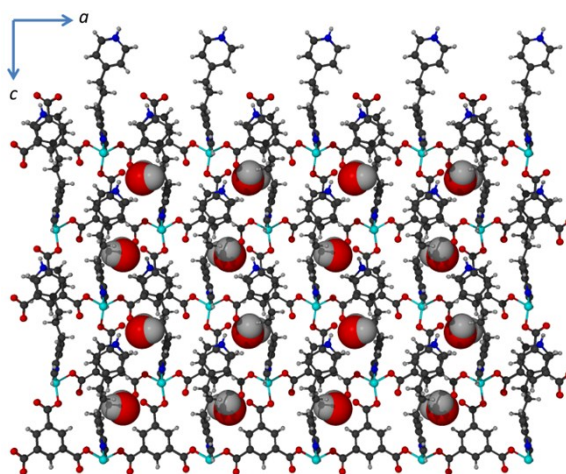

**Figure S3. View of overall packing arrangement of 1·H<sub>2</sub>O showing the included water molecules (for clarity the main framework has been shown in the ball-stick model and the water molecules are represented as CPK models).**

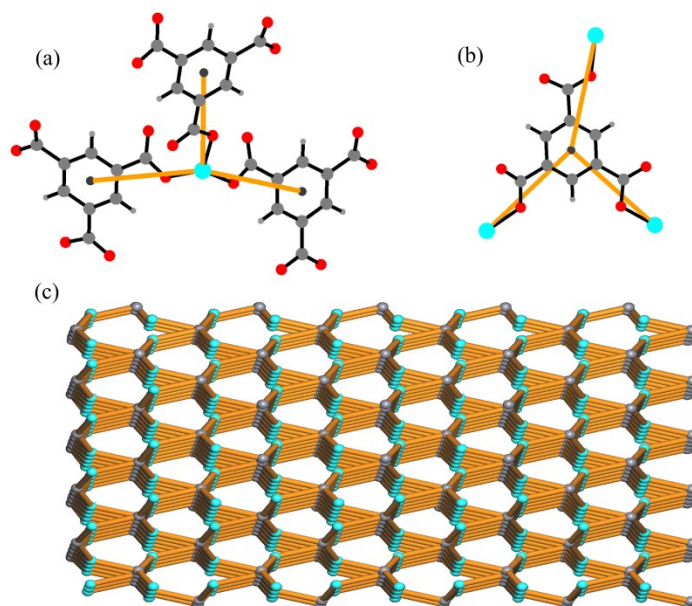

**Figure S3.** Perspective view of (a) 3-connected Zn node, (b) 3-connected ligand node and (c) (10,3)-d (**utp**) net topology  $1 \cdot \text{H}_2\text{O}$ .

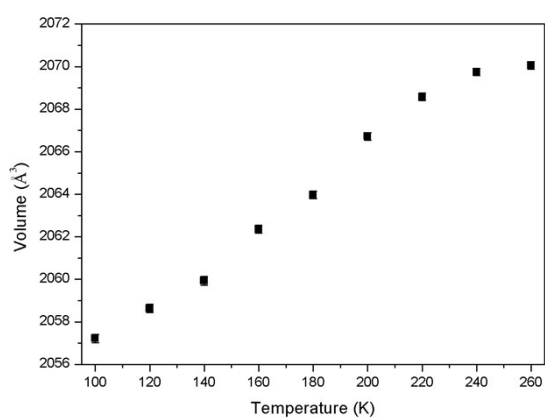

**Figure S5.** Variation of unit cell volume of  $1 \cdot \text{H}_2\text{O}$  (including standard deviations) with temperature.

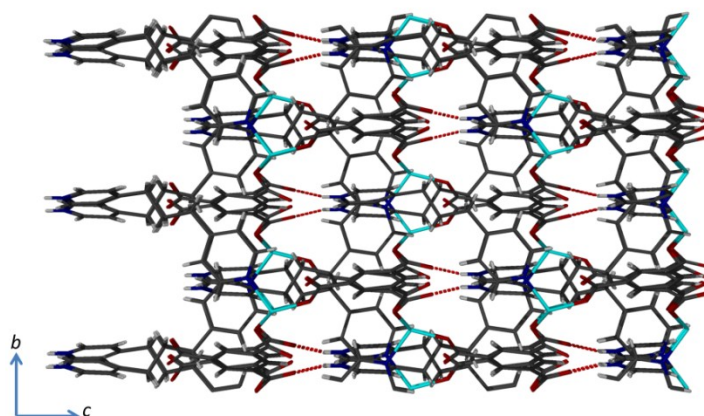

**Figure S6.** View of overall packing arrangement of  $1 \cdot \text{H}_2\text{O}$  showing the N-H...O hydrogen bonding interactions (water molecules are removed for clarity).

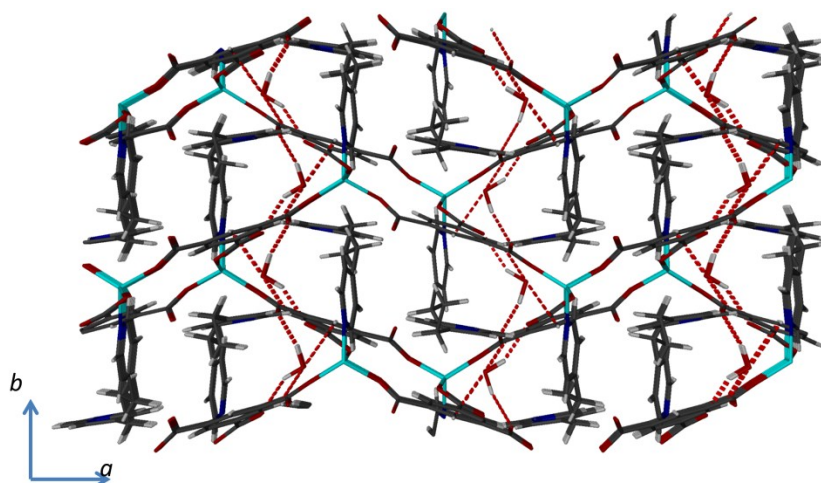

**Figure S7.** View of overall packing arrangement of  $1 \cdot \text{H}_2\text{O}$  showing the  $\text{O}-\text{H} \cdots \text{O}$  and  $\text{C}-\text{H} \cdots \text{O}$  hydrogen bonding interactions.

**Table S5.** List of selected angles and torsional angles in  $1 \cdot \text{H}_2\text{O}$  in the temperature range 260 K and 100 K.

| T(K) | C15... C16...C17 ( $\theta_1$ ) | N1... C12... C18...N2 ( $\varphi_1$ ) |
|------|---------------------------------|---------------------------------------|
| 260  | 111.5(3)                        | 7.4(5)                                |
| 240  | 111.6(3)                        | 7.4(5)                                |
| 220  | 111.2(2)                        | 7.1(4)                                |
| 200  | 111.0(2)                        | 7.6(4)                                |
| 180  | 110.9(2)                        | 7.3(4)                                |
| 160  | 111.3(2)                        | 7.0(4)                                |
| 140  | 110.8(2)                        | 6.7(4)                                |
| 120  | 110.9(2)                        | 6.5(4)                                |
| 100  | 110.7(2)                        | 6.3(4)                                |

**Table S6.** List of Screw pitch and diameter of helices in  $1 \cdot \text{H}_2\text{O}$  in the temperature range 260 K and 100 K.

| T(K) | Screw Pitch ( $\text{\AA}$ ) | Diameter ( $\text{\AA}$ ) |
|------|------------------------------|---------------------------|
| 260  | 7.870(1)                     | 11.239(3)                 |
| 240  | 7.864(1)                     | 11.246(3)                 |
| 220  | 7.857(1)                     | 11.249(3)                 |
| 200  | 7.849(1)                     | 11.250(3)                 |
| 180  | 7.838(1)                     | 11.255(3)                 |
| 160  | 7.829(1)                     | 11.255(3)                 |
| 140  | 7.819(1)                     | 11.256(3)                 |
| 120  | 7.812(1)                     | 11.259(3)                 |
| 100  | 7.804(1)                     | 11.262(3)                 |

**Table S7.** List of  $\text{N}-\text{H} \cdots \text{O}$  hydrogen bonding interactions in  $1 \cdot \text{H}_2\text{O}$  in the temperature range 260 K and 100 K.

| T(K) | d(N-H)   | d(H...O) | d(N...O) | $\angle \text{NHO}$ |
|------|----------|----------|----------|---------------------|
| 260  | 0.860(3) | 1.871(2) | 2.711(4) | 165.1(2)            |
| 240  | 0.870(3) | 1.863(2) | 2.712(4) | 165.0(2)            |
| 220  | 0.870(3) | 1.855(2) | 2.705(3) | 165.0(2)            |
| 200  | 0.880(2) | 1.845(2) | 2.703(3) | 164.5(2)            |
| 180  | 0.880(2) | 1.845(2) | 2.703(3) | 164.6(2)            |
| 160  | 0.880(2) | 1.841(2) | 2.699(3) | 164.3(2)            |
| 140  | 0.880(3) | 1.839(2) | 2.697(3) | 164.4(2)            |
| 120  | 0.880(2) | 1.838(2) | 2.695(3) | 164.2(2)            |
| 100  | 0.880(2) | 1.838(2) | 2.695(3) | 163.9(2)            |

**Table S8.** List of O–H···O hydrogen bonding interactions in **1**·H<sub>2</sub>O in the temperature range 260 K and 100 K.

| T(K) | O1W–H2W1···O5 |          |          |          | O1W–H1W1···O3 |          |          |          |
|------|---------------|----------|----------|----------|---------------|----------|----------|----------|
|      | d(O–H)        | d(H···O) | d(O···O) | <OHO     | d(O–H)        | d(H···O) | d(O···O) | <OHO     |
| 260  | 0.908(4)      | 1.932(2) | 2.824(5) | 167.0(3) | 0.913(4)      | 2.001(3) | 2.851(5) | 154.3(3) |
| 240  | 0.880(4)      | 1.963(2) | 2.830(4) | 167.9(2) | 0.913(4)      | 2.045(2) | 2.848(5) | 146.1(2) |
| 220  | 0.892(3)      | 1.939(2) | 2.826(4) | 172.2(2) | 0.916(4)      | 1.927(2) | 2.843(5) | 176.5(2) |
| 200  | 0.890(3)      | 1.940(2) | 2.826(4) | 174.0(2) | 0.902(3)      | 1.985(2) | 2.843(4) | 158.3(2) |
| 180  | 0.924(3)      | 1.917(2) | 2.823(4) | 165.9(2) | 0.904(3)      | 1.951(2) | 2.847(4) | 170.6(2) |
| 160  | 0.912(3)      | 1.923(2) | 2.824(4) | 169.2(2) | 0.913(3)      | 1.936(2) | 2.840(4) | 170.4(2) |
| 140  | 0.901(3)      | 1.931(2) | 2.828(4) | 173.7(2) | 0.902(3)      | 2.003(2) | 2.835(4) | 152.6(2) |
| 120  | 0.901(3)      | 1.926(2) | 2.826(4) | 176.0(2) | 0.917(3)      | 1.934(2) | 2.836(4) | 167.5(2) |
| 100  | 0.936(3)      | 1.975(2) | 2.823(4) | 149.6(2) | 0.938(3)      | 2.099(2) | 2.838(4) | 134.7(2) |

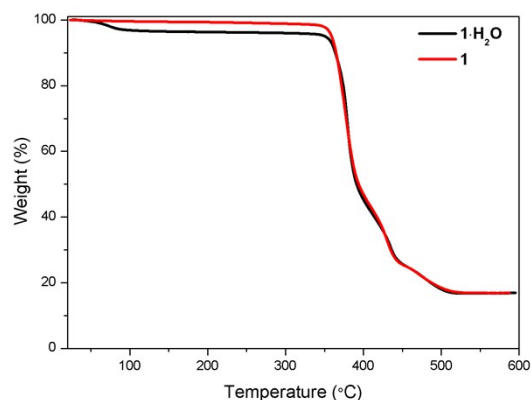

**Figure S8.** Thermogravimetric analysis of **1**·H<sub>2</sub>O (black) and **1** (red).

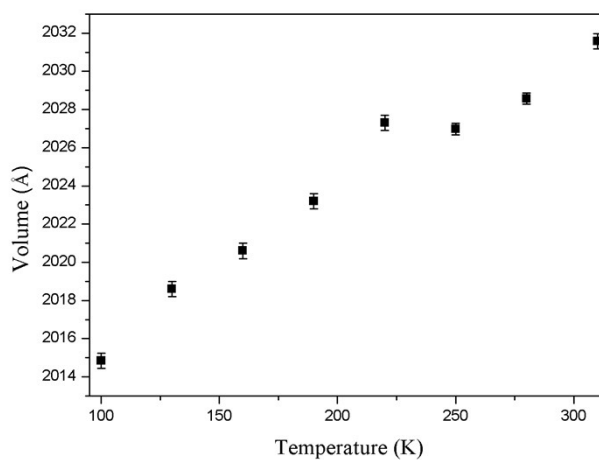

**Figure S9.** Variation of unit cell volume of **1** (including standard deviations) with temperature.

**Table S9.** List of selected angles and torsional angles in **1** in the temperature range 310 K and 100 K.

| T(K) | C15···C16···C17 ( $\theta_2$ ) | N1···C12···C18···N2 ( $\varphi_2$ ) |
|------|--------------------------------|-------------------------------------|
| 310  | 112.5(5)                       | 7.5(8)                              |
| 280  | 111.8(5)                       | 8.4(7)                              |
| 250  | 110.7(5)                       | 9.4(7)                              |
| 220  | 110.6(4)                       | 10.5(6)                             |
| 190  | 110.0(3)                       | 11.2(6)                             |
| 160  | 109.7(3)                       | 11.5(6)                             |
| 130  | 109.6(3)                       | 12.3(5)                             |
| 100  | 109.2(3)                       | 13.0(5)                             |



**Table S10.** List of Screw pitch and diameter of helices in **1** in the temperature range 310 K and 100 K.

| T(K) | Screw Pitch (Å) | Diameter (Å) |
|------|-----------------|--------------|
| 310  | 7.831(1)        | 11.105(5)    |
| 280  | 7.818(1)        | 11.112(5)    |
| 250  | 7.808(1)        | 11.117(5)    |
| 220  | 7.801(1)        | 11.129(4)    |
| 190  | 7.788(1)        | 11.132(4)    |
| 160  | 7.777(1)        | 11.135(4)    |
| 130  | 7.766(1)        | 11.143(4)    |
| 100  | 7.753(1)        | 11.146(4)    |

**Table S11.** List of N–H···O hydrogen bonding interactions in **1** in the temperature range 310 K and 100 K.

| T(K) | d(O–H)   | d(H···N) | d(O···N) | <OHN     |
|------|----------|----------|----------|----------|
| 310  | 0.859(4) | 1.813(4) | 2.643(6) | 161.8(3) |
| 280  | 0.859(4) | 1.808(3) | 2.639(5) | 162.1(3) |
| 250  | 0.870(4) | 1.804(3) | 2.641(5) | 160.6(3) |
| 220  | 0.869(3) | 1.804(3) | 2.639(5) | 160.3(3) |
| 190  | 0.880(3) | 1.794(3) | 2.637(4) | 159.9(2) |
| 160  | 0.880(3) | 1.799(3) | 2.639(4) | 158.8(2) |
| 130  | 0.879(3) | 1.798(3) | 2.637(4) | 158.7(2) |
| 100  | 0.880(3) | 1.794(3) | 2.634(4) | 158.7(2) |

### Differential scanning calorimetry analysis

Differential scanning calorimetry (DSC) measurement was carried out at the heating rate of 10 °C min<sup>-1</sup> in the temperature range of 100–310 K, under nitrogen flow of 50 mL min<sup>-1</sup> on a DSC Q100 instrument. The sample was placed in an aluminum pan with a lid. An empty sealed pan was used as a reference.

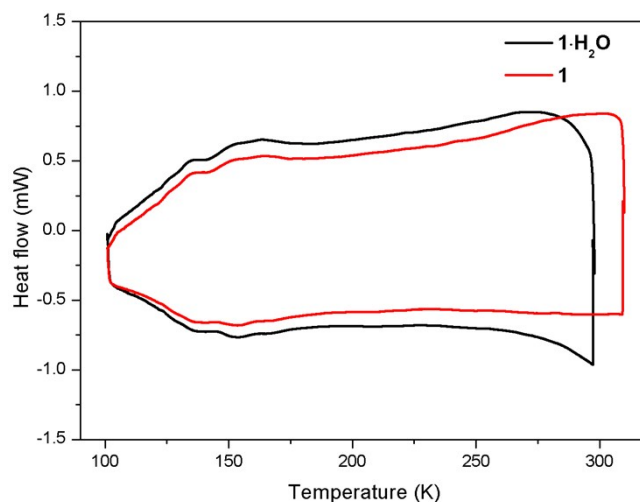

**Figure S10.** Differential scanning calorimetric thermogram of **1·H<sub>2</sub>O** and **1**.

### References:

1. D. A. Skoog, *Principles of instrumental analysis*, Third edition, Saunders college publishing, 1985, 1–879
2. *SAINT Data Reduction Software*, Version 6.45; Bruker AXS Inc., Madison, WI, 2003.

3. (a) *SADABS*, Version 2.05; Bruker AXS Inc., Madison, WI, 2002; (b) R. H. Blessing, *Acta Crystallogr., Sect. A: Found. Crystallogr.* 1995, **51**, 33–38.
4. G. M. Sheldrick, *Acta Crystallogr., Sect. A: Found. Crystallogr.* 2008, **64**, 112–122.
5. L. J. Barbour, *J. Supramol. Chem.* 2001, **1**, 189–191.
